# Supplementary material for: Neuromuscular control of wingbeat kinematics in Anna's hummingbirds (Calypte anna)
Source: Oxford University Press journal article supplement (doi:10.1242/jeb.043497), 2010-06-25
Supplement: jeb043497-sup-jeb043844tables1.pdf [file jeb043497-sup-jeb043844tables1.pdf]

Table S1. Comparative data on body mass, pectoralis strain and strain rate during flight in birds

| Species                                             | Body mass (g) | Strain (%) | Strain rate (lengths s <sup>-1</sup> ) | Flight speeds or modes       | Study                       |
|-----------------------------------------------------|---------------|------------|----------------------------------------|------------------------------|-----------------------------|
| Rufous hummingbird ( <i>Selasphorus rufus</i> )     | 3             | 10.8       | 7.4                                    | 0–10 m s <sup>-1</sup>       | This study                  |
| Zebra finch ( <i>Taeniopygia guttata</i> )          | 13            | 20.4       | 7.9                                    | 0–14 m s <sup>-1</sup>       | Tobalske et al., 2005       |
| Zebra finch (2)                                     | 13            | 14         | 6.8                                    | 0–13 m s <sup>-1</sup>       | Ellerby and Askew, 2007     |
| Blue-breasted quail ( <i>Coturnix chinensis</i> )   | 44            | 22.8       | 7.9                                    | Take-off; escape             | Askew et al., 2001          |
| Budgerigar ( <i>Melopsittacus undulatus</i> )       | 45            | 13.5       | 3.8                                    | 4–16 m s <sup>-1</sup>       | Ellerby and Askew, 2007     |
| Cockatiel ( <i>Nymphicus hollandicus</i> )          | 79            | 39         | 5.8                                    | 1–13 m s <sup>-1</sup>       | Hedrick et al., 2003        |
| Black-billed magpie ( <i>Pica hudsonica</i> )       | 182           | 33         | Not reported                           | 0–14 m s <sup>-1</sup>       | Warrick et al., 2001        |
| Northern bobwhite ( <i>Colinus virginianus</i> )    | 200           | 19.1       | 5.9                                    | Take-off; escape             | Tobalske and Dial, 2000     |
| Chukar ( <i>Alectoris chukar</i> )                  | 492           | 22.8       | 6.3                                    | Take-off; escape             | Tobalske and Dial, 2000     |
| Rock dove ( <i>Columba livia</i> )                  | 649           | 32.8       | 5.1                                    | Slow level                   | Biewener et al., 1998       |
| Rock dove (2)                                       | 562           | 38         | 5.3                                    | Ascending; level; descending | Tobalske and Biewener, 2008 |
| Ring-necked pheasant ( <i>Phasianus colchicus</i> ) | 943           | 22.2       | 4.3                                    | Take-off; escape             | Tobalske and Dial, 2000     |
| Mallard ( <i>Anas platyrhynchos</i> )               | 1000          | 29.3       | 3.7                                    | Take-off; escape             | Williamson et al., 2001     |
| Wild turkey ( <i>Meleagris gallopavo</i> )          | 5275          | 35.2       | 4.8                                    | Take-off; escape             | Tobalske and Dial, 2000     |
